# Supplementary material
Source: ML conference proceedings conference paper supplement (https://aclanthology.org/K19-1050)
Supplement: Supplementary_Material [file CoNLL2019_CogniVal_supplementyr_v3.pdf › CoNLL2019_CogniVal_supplementyr_v3.pdf]

## A Data Preprocessing

### A.1 Eye-tracking Features

| Description                                                             | Data source                                              |
|-------------------------------------------------------------------------|----------------------------------------------------------|
| First fixation duration                                                 | Dundee, GECO, Provo, UCL, ZuCo                           |
| First pass duration (first fixation duration in the first pass reading) | Dundee, GECO, Provo, UCL, ZuCo                           |
| Mean fixation duration                                                  | Dundee, GECO, Provo, ZuCo, CFILT-Sarcasm, CFILT-Scanpath |
| Fixation probability                                                    | Dundee                                                   |
| Re-read probability                                                     | Dundee                                                   |
| Total fixation duration                                                 | Dundee, GECO, Provo, ZuCo                                |
| Total duration of all regression going from this word                   | Dundee                                                   |
| Total duration of all regression going to this word                     | Dundee                                                   |
| Number of fixations                                                     | Dundee, GECO, Provo, ZuCo                                |
| Number of long regression (>3 tokens) going from this word              | Dundee                                                   |
| Number of long regression (>3 tokens) going to this word                | Dundee                                                   |
| Number of refixations                                                   | Dundee                                                   |
| Number of regressions going from this word                              | Dundee, Provo                                            |
| Number of regressions going to this word                                | Dundee, Provo                                            |
| The duration of the last fixation on the current word                   | GECO                                                     |
| Go-past time                                                            | GECO, Provo, UCL, ZuCo                                   |
| No fixation occurred in first-pass reading                              | GECO, Provo                                              |
| Right-bounded reading time                                              | UCL                                                      |

Table 5: Eye-tracking features provided in the gaze corpora used in this work

### A.2 EEG

All four EEG datasets are converted to the EEGLab format<sup>4</sup>, if not already provided in this format. The UCL dataset had been preprocessed by the authors. For the other three datasets, bandpass filtering, artifact removal (i.e. removing blinks and other muscle activity) and quality assessment was performed with Automagic<sup>5</sup>.

After preprocessing and retaining only the subjects with good data quality, we use the data of 3 subjects from the N400 dataset, 14 subjects from Natural Speech, 12 subject from ZuCo and the same number of subjects as originally from UCL (i.e. 24).

### A.3 fMRI

As mentioned in the main paper, we use the preprocessing pipeline from Beinborn et al. (2019) to read the fMRI data, align the scans and select the voxels. We used the NOUNS and PEREIRA readers as is and modified the HARRY POTTER and ALICE readers to extract word-level signals.

<sup>4</sup><https://scn.ucsd.edu/eeglab/index.php>

<sup>5</sup><https://github.com/methlabUZH/automagic>

## B Detailed Results

| <b>embeddings</b> | GECo  | ZuCo  | PROVO | DUNDEE | SARCASM | SCANPATH | UCL   |
|-------------------|-------|-------|-------|--------|---------|----------|-------|
| glove-50          | 0.010 | 0.008 | 0.031 | 0.010  | 0.016   | 0.023    | 0.044 |
| glove-100         | 0.018 | 0.017 | 0.051 | 0.014  | 0.027   | 0.043    | 0.054 |
| glove-200         | 0.026 | 0.024 | 0.047 | 0.021  | 0.039   | 0.038    | 0.054 |
| glove-300         | 0.020 | 0.019 | 0.047 | 0.016  | 0.033   | 0.038    | 0.059 |
| word2vec          | 0.015 | 0.011 | 0.024 | 0.014  | 0.022   | 0.018    | 0.028 |
| fasttext-crawl    | 0.011 | 0.009 | 0.017 | 0.014  | 0.020   | 0.010    | 0.023 |
| fasttext-wikinews | 0.010 | 0.008 | 0.015 | 0.014  | 0.019   | 0.009    | 0.019 |
| bert-base         | 0.007 | 0.003 | 0.006 | 0.008  | 0.009   | 0.006    | 0.003 |
| wordnet2vec       | 0.018 | 0.012 | 0.027 | 0.016  | 0.023   | 0.017    | 0.040 |
| bert-large        | 0.008 | 0.004 | 0.006 | 0.008  | 0.011   | 0.006    | 0.003 |
| elmo              | 0.012 | 0.009 | 0.020 | 0.011  | 0.014   | 0.012    | 0.021 |

Table 6: Absolute mean squared error averaged over all features for each combination, i.e. averaged error of all eye-tracking features for each dataset.

| <b>embeddings</b> | HARRY POTTER | NOUNCS | ALICE | PEREIRA |
|-------------------|--------------|--------|-------|---------|
| glove-50          | 0.005        | 0.204  | 0.036 | 0.044   |
| glove-100         | 0.015        | 0.220  | 0.069 | 0.055   |
| glove-200         | 0.007        | 0.224  | 0.036 | 0.050   |
| glove-300         | 0.008        | 0.224  | 0.038 | 0.050   |
| word2vec          | 0.005        | 0.209  | 0.010 | 0.044   |
| fasttext-crawl    | 0.002        | 0.194  | 0.009 | 0.039   |
| fasttext-wikinews | 0.001        | 0.185  | 0.004 | 0.037   |
| bert-base         | 0.001        | 0.042  | 0.001 | 0.012   |
| wordnet2vec       | 0.015        | 0.203  | 0.050 | 0.046   |
| bert-large        | 0.001        | 0.055  | 0.001 | 0.013   |
| elmo              | 0.001        | 0.135  | 0.001 | 0.034   |

Table 7: Absolute mean squared error averaged over all voxels in each fMRI dataset.

| <b>embeddings</b> | N400  | NATURAL SPEECH | ZuCo  | UCL   |
|-------------------|-------|----------------|-------|-------|
| glove-50          | 0.067 | 0.014          | 0.009 | 0.009 |
| glove-100         | 0.126 | 0.023          | 0.011 | 0.011 |
| glove-200         | 0.071 | 0.017          | 0.013 | 0.013 |
| glove-300         | 0.067 | 0.018          | 0.014 | 0.014 |
| word2vec          | 0.047 | 0.017          | 0.012 | 0.012 |
| fasttext-crawl    | 0.042 | 0.013          | 0.011 | 0.011 |
| fasttext-wikinews | 0.037 | 0.012          | 0.010 | 0.010 |
| bert-base         | 0.014 | 0.005          | 0.006 | 0.006 |
| wordnet2vec       | 0.089 | 0.020          | 0.015 | 0.015 |
| bert-large        | 0.012 | 0.006          | 0.006 | 0.006 |
| elmo              | 0.024 | 0.008          | 0.008 | 0.008 |

Table 8: Absolute mean squared error averaged over all electrodes in each EEG dataset.

## B.1 Correlations between datasets

The following plots show example correlations between the prediction results within one modality, but across datasets. It shows correlations between different stimuli and different recording procedures.

### Correlations between eye-tracking datasets

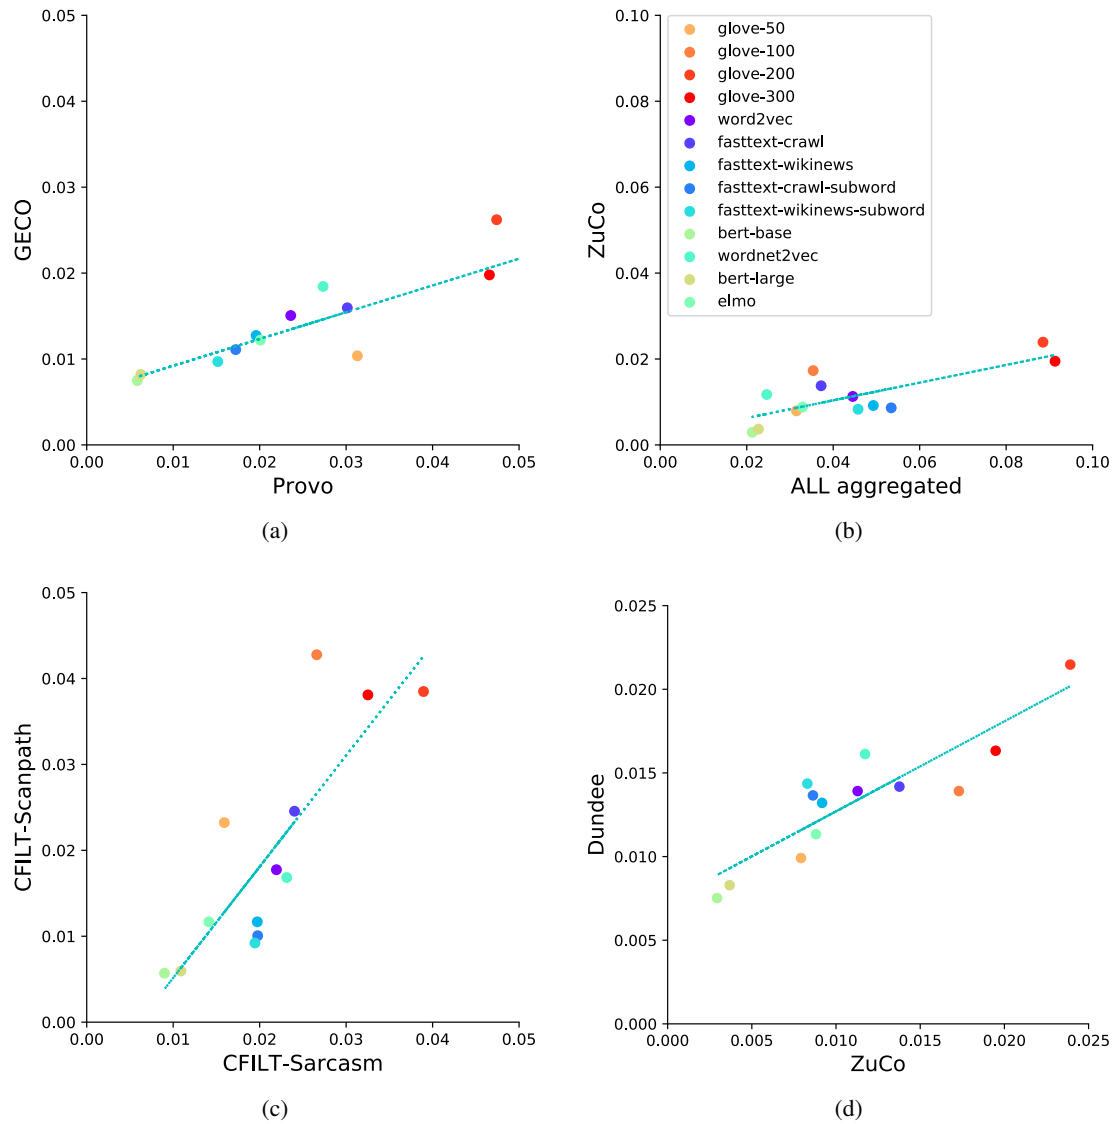

Figure 9: Correlation plots between the prediction results of eye-tracking datasets.

## Correlations between fMRI datasets

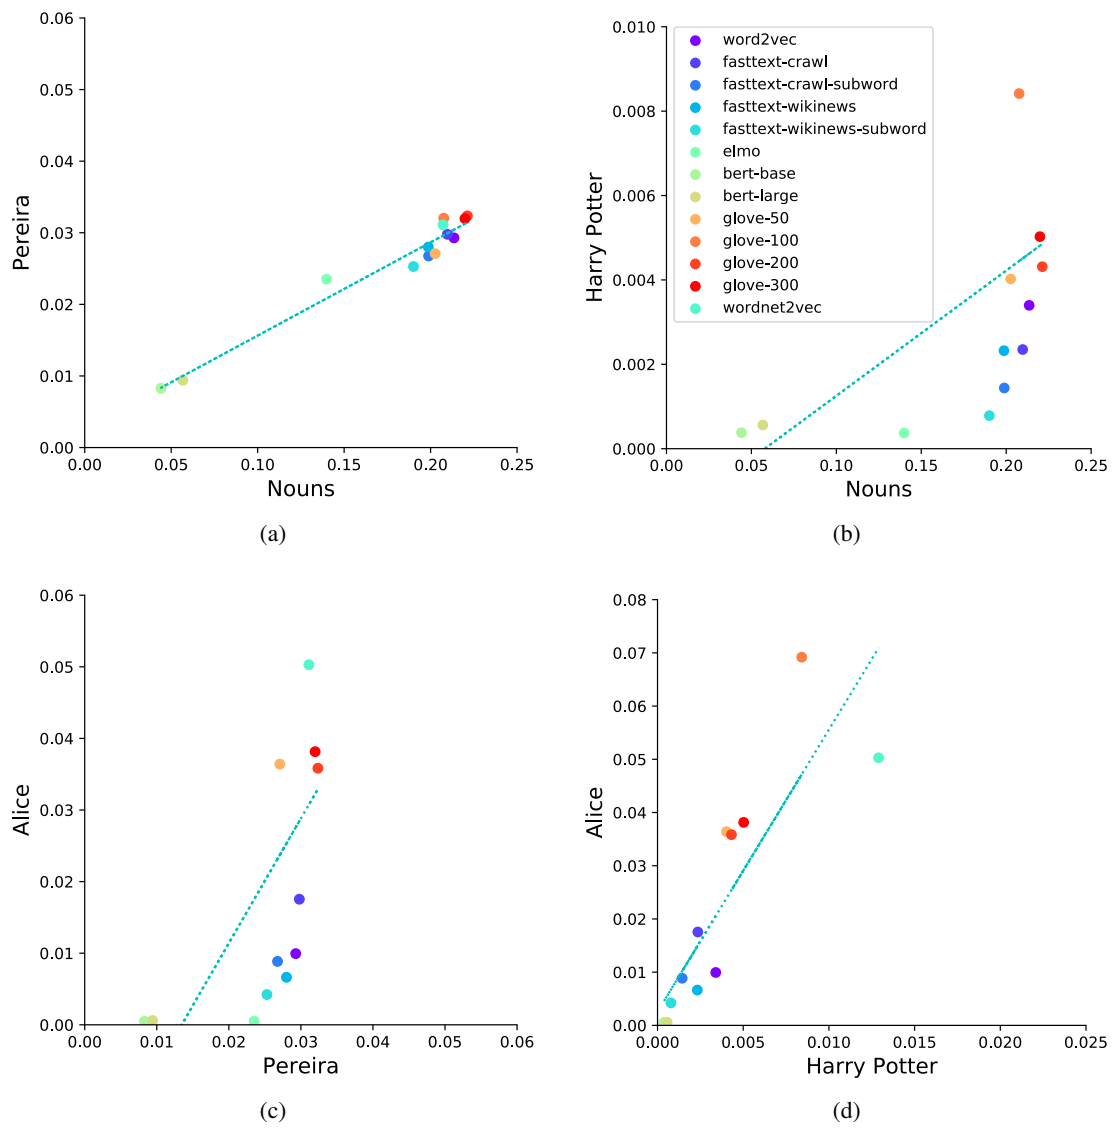

Figure 10: Correlation plots between the prediction results of fMRI datasets.
